# Supplementary material
Source: PubMed Central journal article supplement (PMC170946)

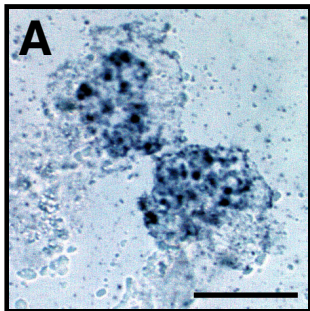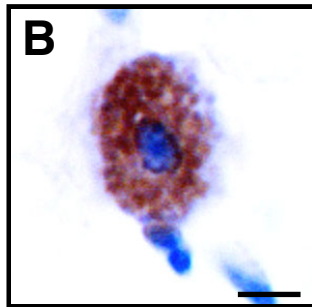

Supplement: pnas_1531901100_2.pdf [file pnas_1531901100_2.pdf]

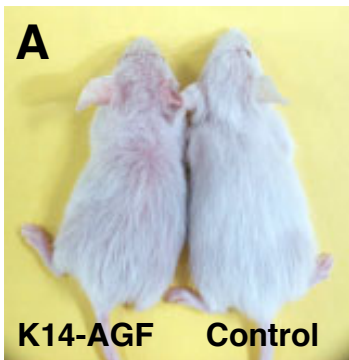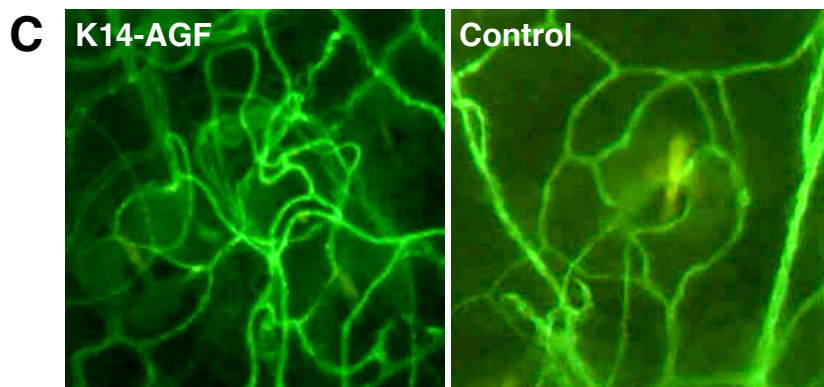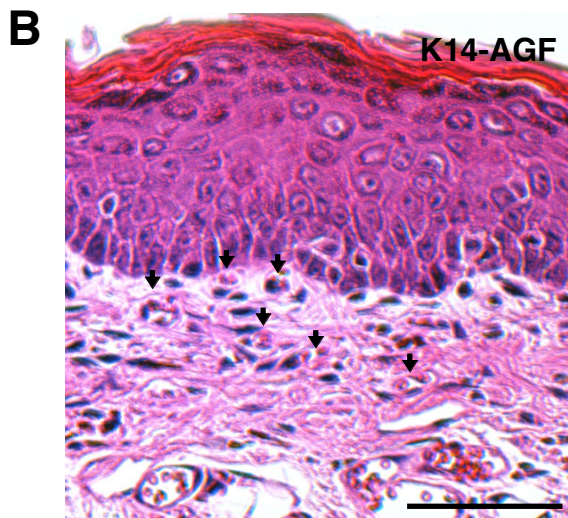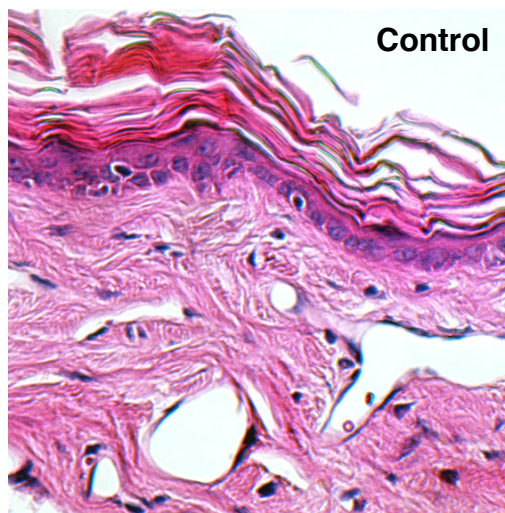

Supplement: pnas_1531901100_4.pdf [file pnas_1531901100_4.pdf]

**A**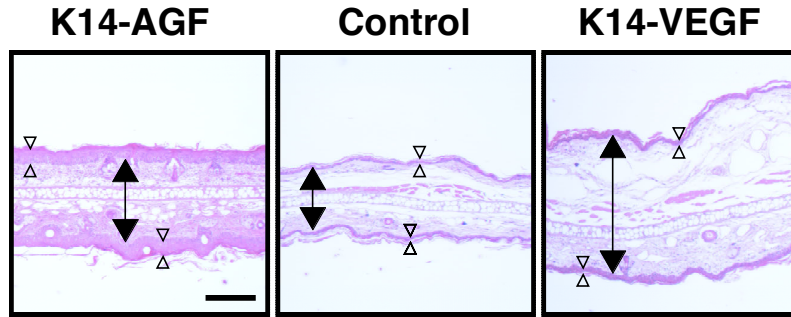**B**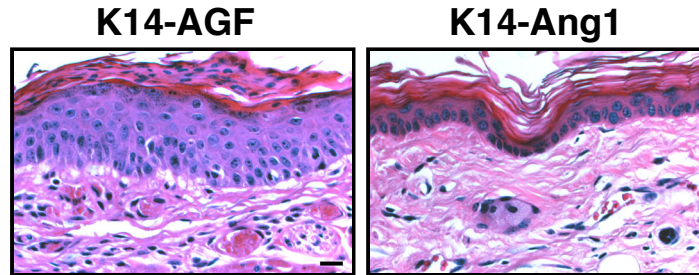

Supplement: pnas_1531901100_7.pdf [file pnas_1531901100_7.pdf]

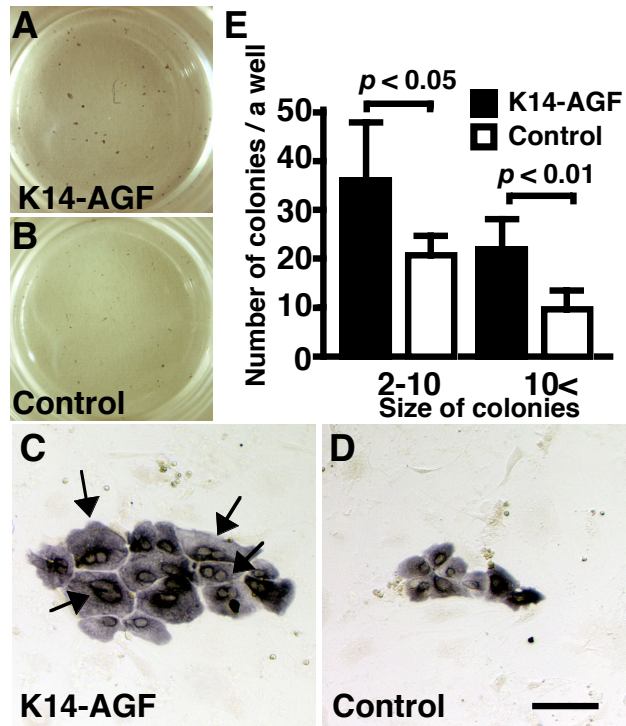

Supplement: pnas_1531901100_9.pdf [file pnas_1531901100_9.pdf]
